CORRECTION

## Correction: Therapeutic itineraries and testimonies of COVID-19 patients in Manaus, the epicenter of the pandemic in the Brazilian Amazon

Igor Castro Tavares, Denise Maria Guerreiro da Silva, Wagner Ferreira Monteiro, Kássia Janara Veras Lima, Darlisom Sousa Ferreira, Wuelton Marcelo Monteiro, Flávia Regina Souza Ramos

The Funding statement for this article is incorrect. The correct Funding statement is as follows: This study was funded by the Fundação de Amparo à Pesquisa do Estado do Amazonas (FAPEAM) under Call No. 038/2022 – PDPG/CAPES/FAPEAM – Coordinator/Financial Support. The funders had no role in study design, data collection and analysis, decision to publish, or preparation of the manuscript.

### Reference

1. Tavares IC, Maria Guerreiro da Silva D, Ferreira Monteiro W, Janara Veras Lima K, Sousa Ferreira D, Marcelo Monteiro W, et al. Therapeutic itineraries and testimonies of COVID-19 patients in Manaus, the epicenter of the pandemic in the Brazilian Amazon. PLoS One. 2025;20(7):e0327127. <https://doi.org/10.1371/journal.pone.0327127> PMID: [40705812](https://pubmed.ncbi.nlm.nih.gov/40705812/)

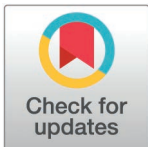

### OPEN ACCESS

**Citation:** Tavares IC, Maria Guerreiro da Silva D, Ferreira Monteiro W, Janara Veras Lima K, Sousa Ferreira D, Marcelo Monteiro W, et al. (2026) Correction: Therapeutic itineraries and testimonies of COVID-19 patients in Manaus, the epicenter of the pandemic in the Brazilian Amazon. PLoS One 21(1): e0340129. <https://doi.org/10.1371/journal.pone.0340129>

**Published:** January 2, 2026

**Copyright:** © 2026 Tavares et al. This is an open access article distributed under the terms of the [Creative Commons Attribution License](https://creativecommons.org/licenses/by/4.0/), which permits unrestricted use, distribution, and reproduction in any medium, provided the original author and source are credited.
